# Supplementary material for: Facile synthesis of solution-processed MoS2nanosheets and their application in high-performance ultraviolet organic light-emitting diodes
Source: Royal Society of Chemistry journal article supplement (doi:10.1039/c8tc05370g), 2018-12-13
Supplement: c8tc05370g1.pdf [file c8tc05370g1.pdf]

# Supporting Information

## Facile synthesis of solution-processed MoS<sub>2</sub> nanosheet and its application for high-performance ultraviolet organic light-emitting diodes

Xiaowen Zhang<sup>a,\*</sup>, Wanshu Li<sup>a</sup>, Zhitian Ling<sup>b</sup>, Yan Zhang<sup>a</sup>, Jiwen Xu<sup>a</sup>, Hua Wang<sup>a</sup>,  
Guohua Chen<sup>a</sup>, Bin Wei<sup>b,\*</sup>

<sup>a</sup> School of Materials Science and Engineering & Guangxi Key Laboratory of Information Materials, Guilin University of Electronic Technology, Guilin 541004, P.R. China.

<sup>b</sup> Key Laboratory of Advanced Display and System Applications, Ministry of Education, Shanghai University, Shanghai 200072, P.R. China.

**\*Corresponding authors**

**E-mail:** zhang-xiaowen@163.com (X. Zhang); bwei@shu.edu.cn (B. Wei)

**Table S1** Summarization of some reported visible OLEDs with HILs of MoS<sub>2</sub> and its composites, and comparison with similar candidates

| HIL                                             | Emissive layer          | Maximum LE (cd/A)           | Maximum PE (lm/W)           | Maximum luminance (cd/m <sup>2</sup> ) | Reference            |
|-------------------------------------------------|-------------------------|-----------------------------|-----------------------------|----------------------------------------|----------------------|
| MoS <sub>2</sub> +PEDOT:PSS                     | Alq <sub>3</sub>        | 8.1                         | 5.7                         | 24064                                  | This work            |
| MoS <sub>2</sub> -UVO                           | Alq <sub>3</sub>        | 7.5                         | 3.5                         | 23203                                  | This work            |
| MoS <sub>2</sub> -UVO                           | Alq <sub>3</sub> :C545T | 14.7                        | 4.3                         | 23300                                  | Ref. 38              |
| MoS <sub>2</sub> -UVO                           | Alq <sub>3</sub> :C545T | 12.01                       | 3.43                        | 18900                                  | Ref. 36              |
| MoS <sub>2</sub> -UVO                           | Alq <sub>3</sub> :C545T | 9.44                        | 2.53                        | 16700                                  | Ref. 18              |
| MoS <sub>2</sub> -GO                            | Alq <sub>3</sub> :C545T | 11.22                       | 3.77                        | 20300                                  | Ref. 29              |
| MoS <sub>2</sub> /MoO <sub>3</sub>              | Alq <sub>3</sub>        | 4.36@100mA                  | 2.1 @100mA                  | -                                      | Ref. 41              |
| Rubbing/ion-beam treated MoS <sub>2</sub>       | F8BT                    | 2.6                         | -                           | 5700                                   | Ref. 40              |
| O <sub>2</sub> -plasma treated MoS <sub>2</sub> | polyfluorene            | 7.3 @1000 cd/m <sup>2</sup> | 9.6 @1000 cd/m <sup>2</sup> | -                                      | Ref. S1 <sup>#</sup> |
| CN <sub>x</sub> H <sub>y</sub>                  | Alq <sub>3</sub>        | 8.3                         | 4.3                         | 16922                                  | Ref. 28              |
| MoO <sub>x</sub>                                | Alq <sub>3</sub>        | 8.1                         | 5.0                         | 8475                                   | Ref. 20              |

<sup>#</sup>S1 G. L. Frey, K. J. Reynolds and R. H. Friend, *Adv. Mater.* 2002, **14**, 265.

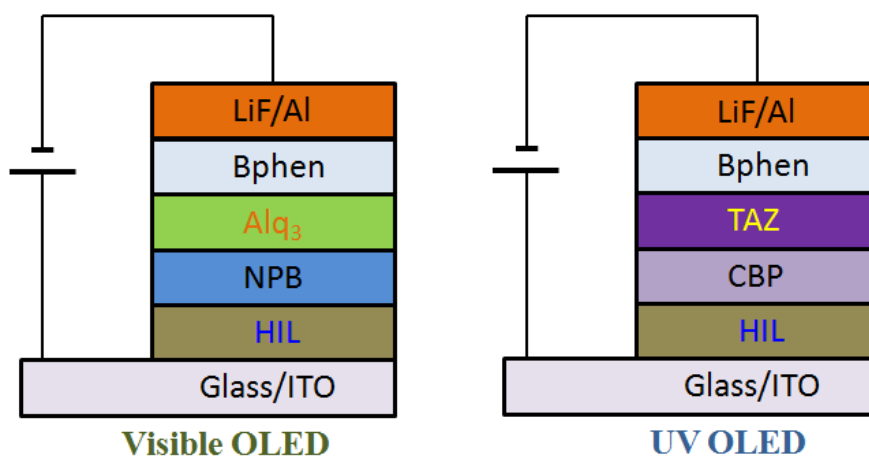

**Fig. S1** Schematic device structures of visible and UV OLEDs.

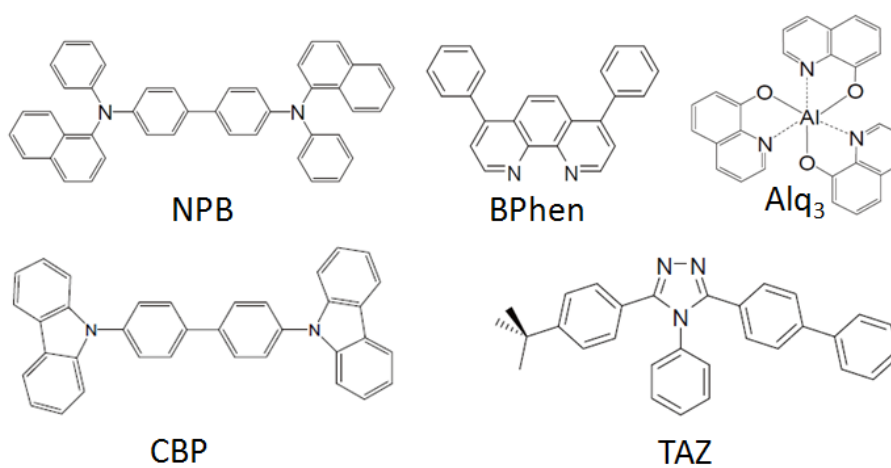

**Fig. S2** Molecular structures of NPB, BPhen, Alq<sub>3</sub>, CBP and TAZ.

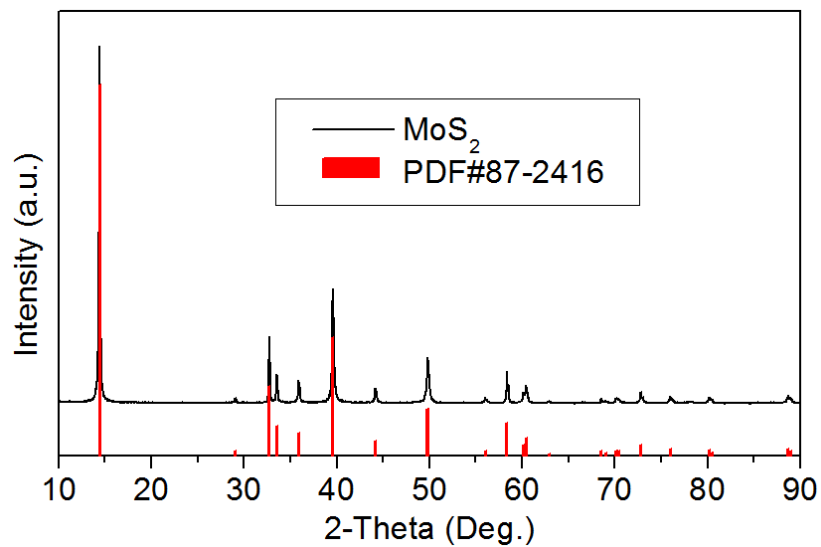

**Fig. S3** XRD pattern of pristine MoS<sub>2</sub> powders and comparison with standard PDF card (No. #87-2416).

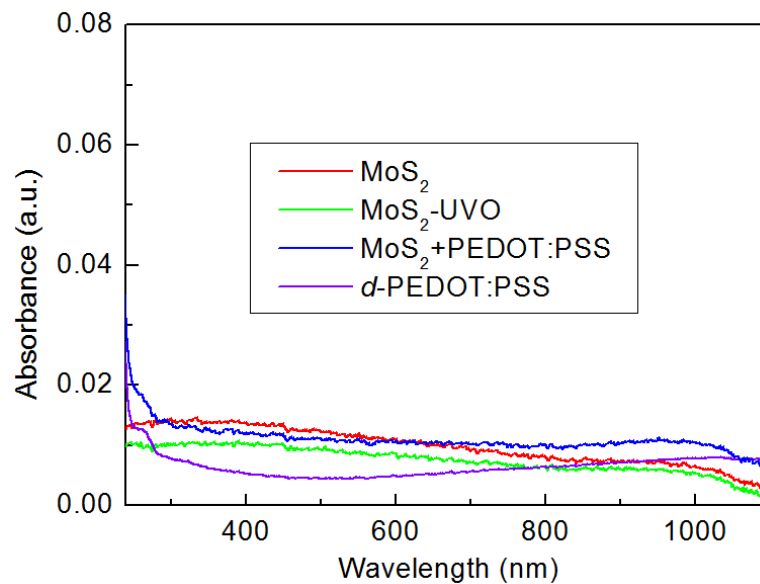

**Fig. S4** UV-visible absorption spectra of MoS<sub>2</sub> (0.3 mg/mL), MoS<sub>2</sub>-UVO (5 s), MoS<sub>2</sub>+PEDOT:PSS (2:1) and *d*-PEDOT:PSS films within the range of 300-1100 nm.

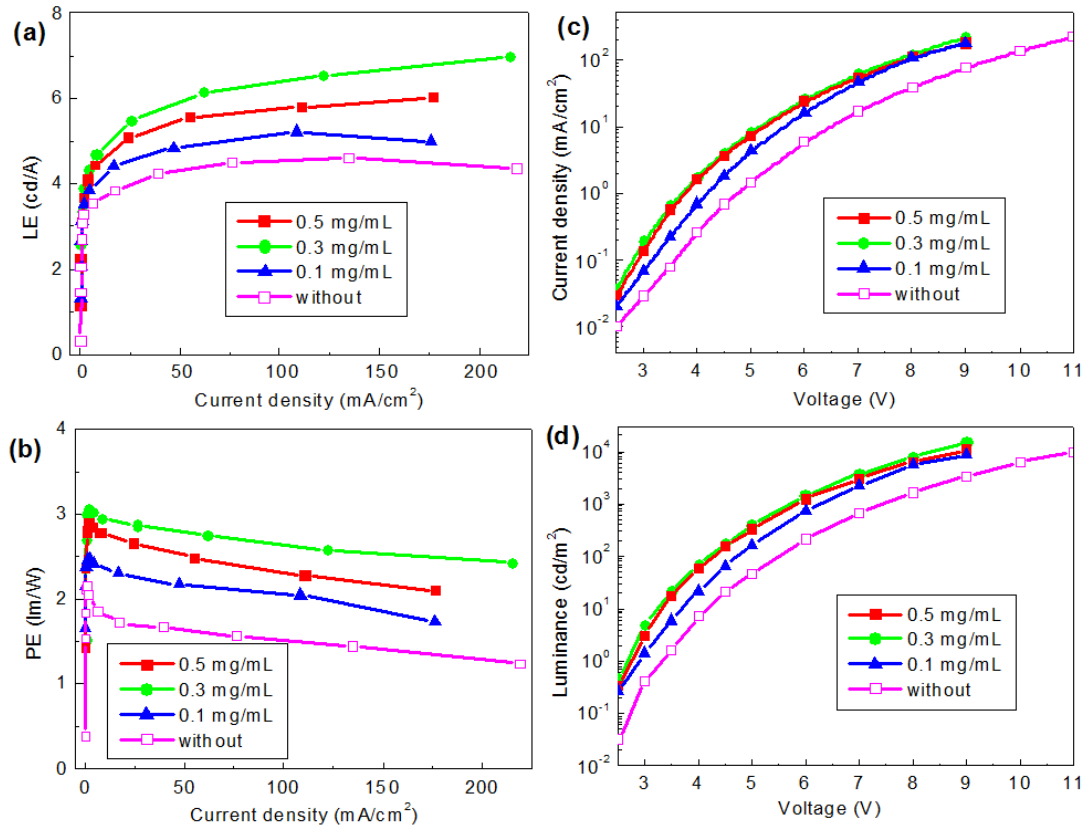

**Fig. S5** Device efficiencies and  $J$ - $V$ - $L$  characteristics of visible OLEDs with MoS<sub>2</sub> HILs having different concentrations (Device A<sub>1</sub>: 0.5 mg/mL, Device A<sub>2</sub>: 0.3 mg/mL, Device A<sub>3</sub>: 0.1 mg/mL), and comparison with the reference (Device A<sub>0</sub>) without any

HIL.

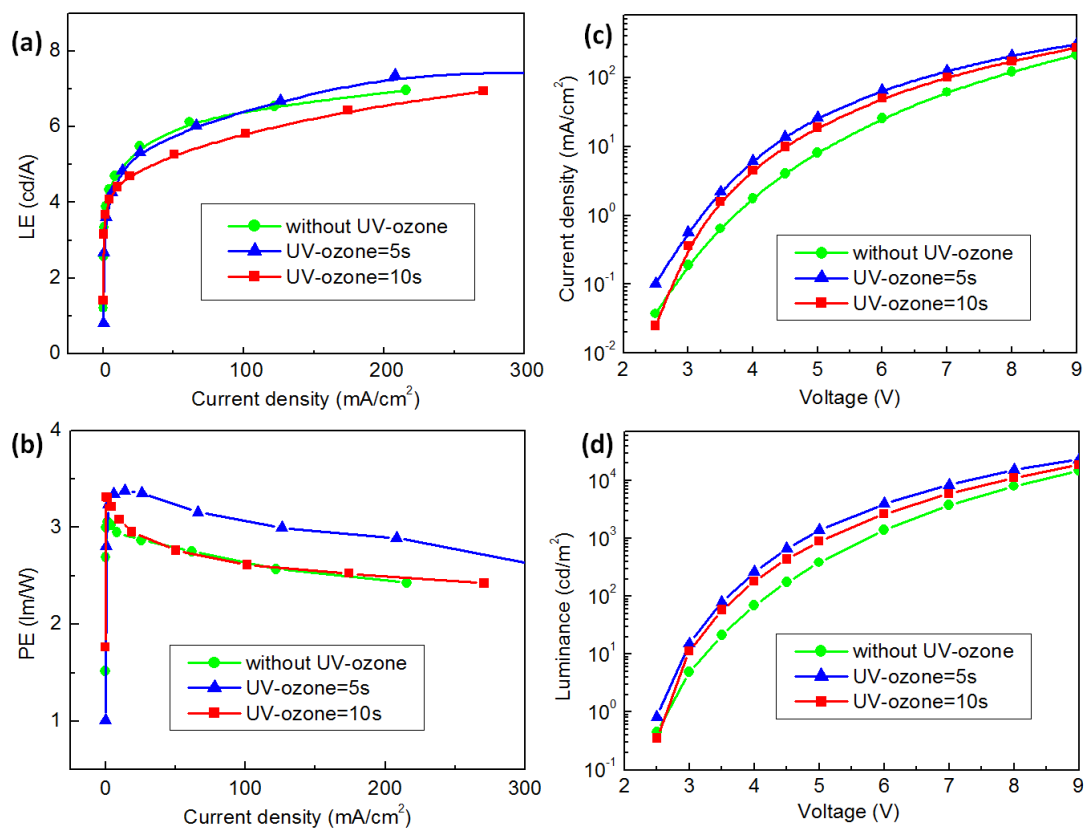

**Fig. S6** Device efficiencies and  $J$ - $V$ - $L$  characteristics of visible OLEDs having HILs of MoS<sub>2</sub> (0.3 mg/mL) which is treated under UV-ozone irradiation with different time

(Device A<sub>2</sub>: without UV-ozone treatment, Device B: UV-ozone=5 s, Device C:

UV-ozone=10 s).

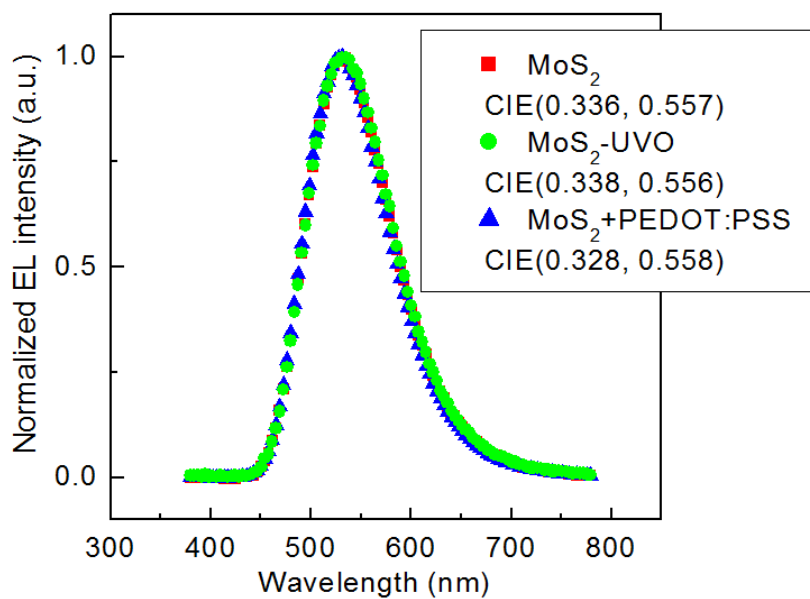

**Fig. S7** EL spectra of Devices A<sub>2</sub>, B and E with HILs of MoS<sub>2</sub> (0.3 mg/mL), MoS<sub>2</sub>-UVO (5 s) and MoS<sub>2</sub>+PEDOT:PSS (2:1), respectively. The corresponding 1931 Commission Internationale de L'Eclairage (CIE) color coordinates are also incorporated in the figure.

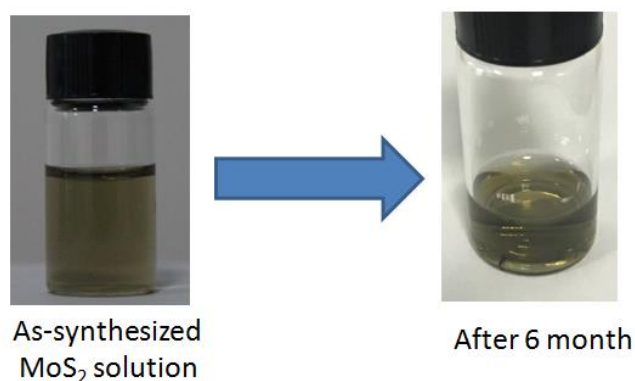

**Fig. S8** As-synthesized MoS<sub>2</sub> aqueous solution and the change after remaining stationary for six month.
